# Supplementary material
Source: PubMed Central journal article supplement (PMC4255400)

## **Chronic kidney disease and hypertension during long-term follow-up in children and adolescents previously treated with extracorporeal membrane oxygenation**

### **Supplemental material**

#### **Figure 6. Chronic kidney disease and hypertension screening results per parameter assessed.**

GFR was estimated using the revised Schwartz formula [ $0.413 \times \text{height}(\text{cm}) / \text{SCr}$ ]. An eGFR below 90 mL/min/1.73m<sup>2</sup> was considered abnormal. Glomerular hyperfiltration was defined as an eGFR  $\geq 150$  mL/min/1.73m<sup>2</sup>.

Proteinuria was quantified as a uP/C ratio  $>0.50$  mg protein/mg creatinine for children aged  $\leq 24$  months and  $>0.20$  mg protein/mg creatinine for children older than 24 months. If proteinuria was identified, urinalysis was repeated three times in a first morning sample to rule out an orthostatic effect. In case of orthostatic proteinuria, the participant was scored negative for proteinuria.

Prehypertension, stage 1 and stage 2 hypertension were defined as a mean systolic and/or diastolic blood pressure between 90<sup>th</sup> and 95<sup>th</sup> percentile, blood pressure  $\geq 95^{\text{th}}$  and  $\leq 99^{\text{th}}$  percentile or blood pressure  $>99^{\text{th}}$  percentile, respectively, of reference values for sex, height standard deviation score, and age.

**Abbreviations:** eGFR, estimated glomerular filtration rate; SCr, serum creatinine; uP/C ratio, urinary protein-creatinine ratio; mg, milligram; Yr, year.

### Chronic Kidney Disease and hypertension screening summary

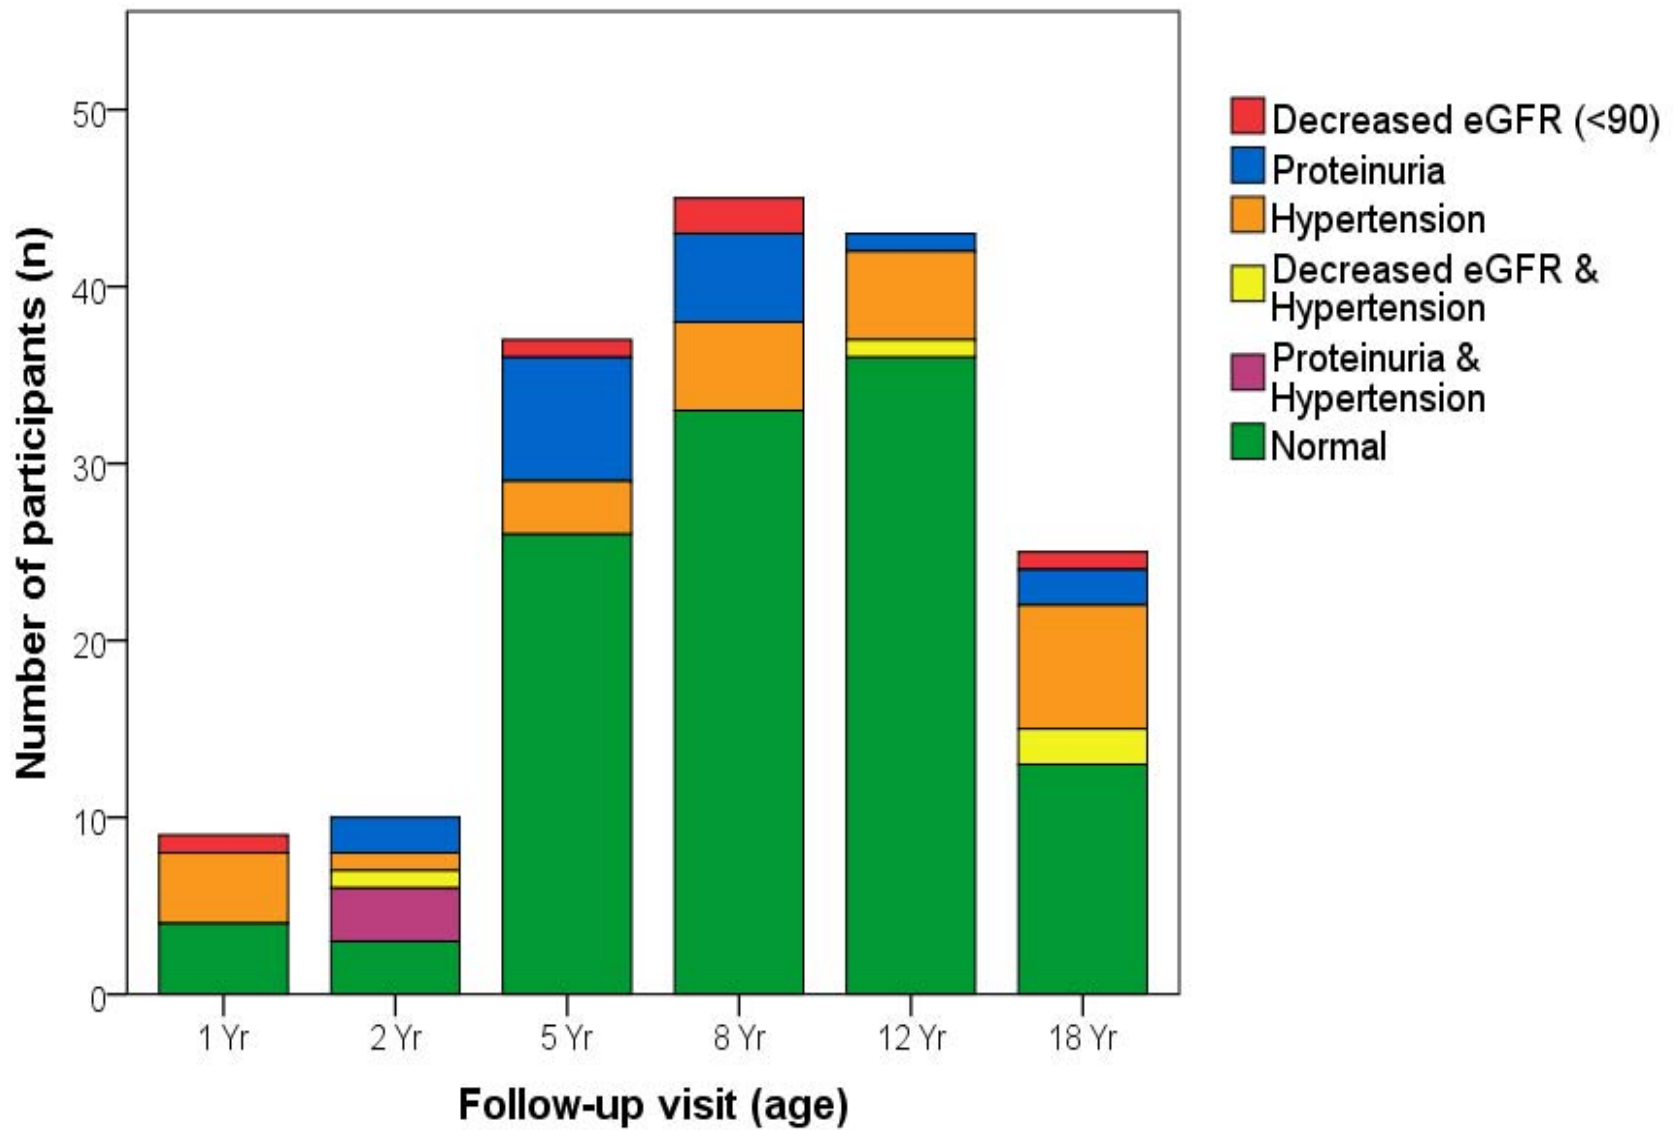

Supplement: CJN.02890314_CJN02890314SupplementaryData.pdf [file CJN.02890314_CJN02890314SupplementaryData.pdf]
